# Supplementary material for: One-Step Synthesis of Sulfur-Doped Nanoporous Carbons from Lignin with Ultra-High Surface Area, Sulfur Content and CO2 Adsorption Capacity
Source: MDPI journal article supplement (doi:10.3390/ma16010455), 2023-01-03
Supplement: s1 [file s1]

# One-Step Synthesis of Sulfur-Doped Nanoporous Carbons from Lignin with Ultra-High Surface Area, Sulfur Content and CO<sub>2</sub> Adsorption Capacity

Dipendu Saha \*, Gerassimos Orkoulas and Dean Bates

Chemical Engineering Department, Widener University, 1 University Place, Chester, PA 19103, USA

\* Correspondence: dsaha@widener.edu, Tel.: +1-610-499-4056, Fax: +1-610-499-4059

**Table S1.** Sips Constants values.

| Samples     | Constants | CO <sub>2</sub> | CH <sub>4</sub> | N <sub>2</sub> |
|-------------|-----------|-----------------|-----------------|----------------|
| <b>LS-1</b> | am        | 4.33828027      | 1.93808298      | 7000           |
|             | b         | 0.00075371      | 0.00049067      | 1.1174E-07     |
|             | n         | 0.96984617      | 0.94422089      | 1.07314567     |
|             |           |                 |                 |                |
| <b>LS-2</b> | am        | 13.2484922      | 244.805507      | 7128.80823     |
|             | b         | 0.00393657      | 9.0754E-05      | 1.1174E-07     |
|             | n         | 1.49426239      | 1.63931258      | 1.07673099     |
|             |           |                 |                 |                |
| <b>LS-3</b> | am        | 511.635183      | 9.49762032      | 2.22610627     |
|             | b         | 8.4685E-05      | 0.00049978      | 0.00036948     |
|             | n         | 1.19472931      | 1.05604419      | 1.01687262     |
|             |           |                 |                 |                |
| <b>LS-4</b> | am        | 4.47440344      | 0.88811551      | 0.75090376     |
|             | b         | 0.00232267      | 0.00102023      | 0.00019535     |
|             | n         | 1.30996255      | 1.1058805       | 0.985238       |
|             |           |                 |                 |                |
| <b>LS-5</b> | am        | 2.12822949      | 1.49855532      | 0.05910709     |
|             | b         | 0.00021294      | 0.0006759       | 7.6156E-06     |
|             | n         | 0.84367693      | 1.08001069      | 0.54040259     |
